# Supplementary material
Source: Research Square preprint supplement (doi:10.21203/rs.3.rs-9413331/v1)

**A Miniature Sorbent-Coated Capillary Device for Efficient Breath Volatile Organic Compound Capture and Analysis**

**Supplementary Materials**

Abbi Abdel-Rehim1,*, Mohamed Abdel-Rehim2

1Department of Chemical Engineering and Biotechnology, University of Cambridge, Cambridge, UK.

2Department of Applied Physics, Royal Institute of Technology, Stockholm, Sweden.

*Corresponding author: [aar52@cam.ac.uk](mailto:aar52@cam.ac.uk)

SEM images:


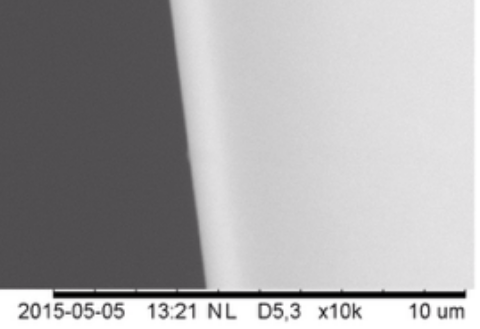


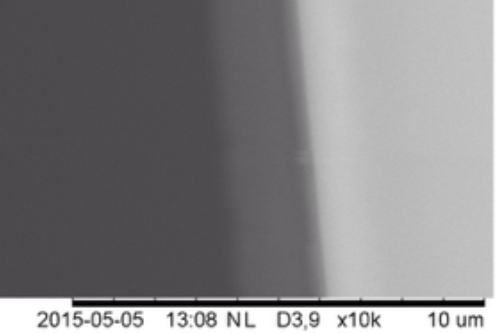


Spectra:


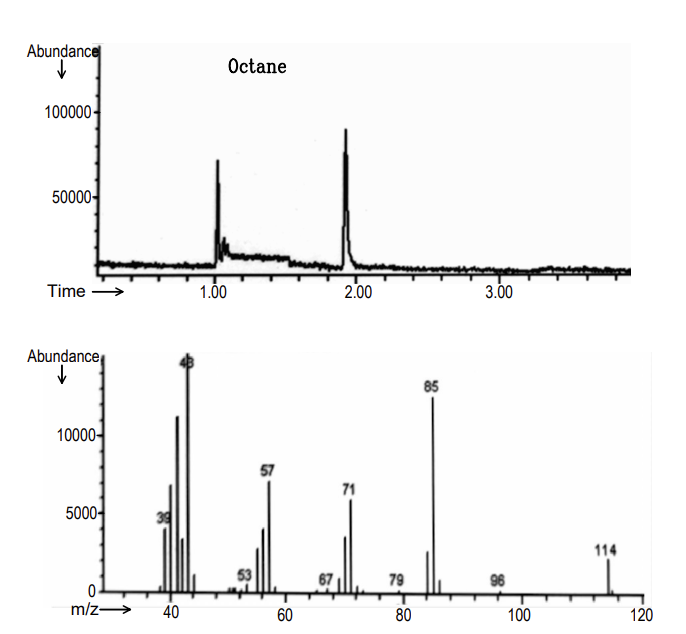


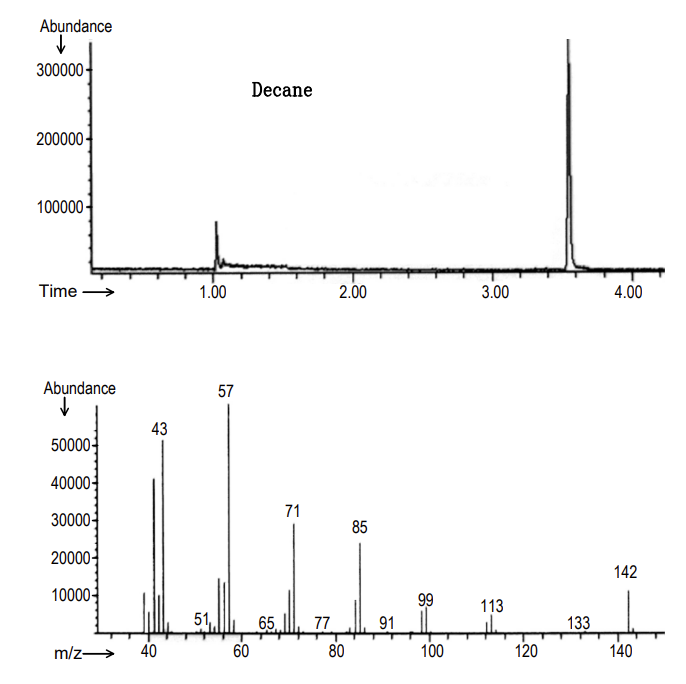

Supplement: Supplementary file 1 [file 00353317a15f7c98ce368f7f.docx]
